# Supplementary material for: p53-dependent SIRT6 expression protects Aβ42-induced DNA damage
Source: Springer Nature journal article supplement (doi:10.1038/srep25628), 2016-05-09

## Supplementary Information

# p53-dependent SIRT6 expression protects A $\beta$ 42-induced DNA damage

*Eun Sun Jung<sup>1</sup>, Hyunjung Choi<sup>1</sup>, Hyundong Song<sup>1</sup>, Yu Jin Hwang<sup>2</sup>, Ahbin Kim<sup>1</sup>, Hoon Ryu<sup>2,3</sup>, Inhee Mook-Jung<sup>1\*</sup>*

\*Corresponding Author:

Inhee Mook-Jung, PhD  
Department of Biochemistry and Biomedical Sciences, Seoul National University,  
College of Medicine, 103 Daehak-ro, Jongro-gu, Seoul 03080, Korea  
E-mail) [inhee@snu.ac.kr](mailto:inhee@snu.ac.kr)  
Phone number) +82-2-740-8245  
Fax number) +82-2-3672-7352

## Supplementary figure 1.

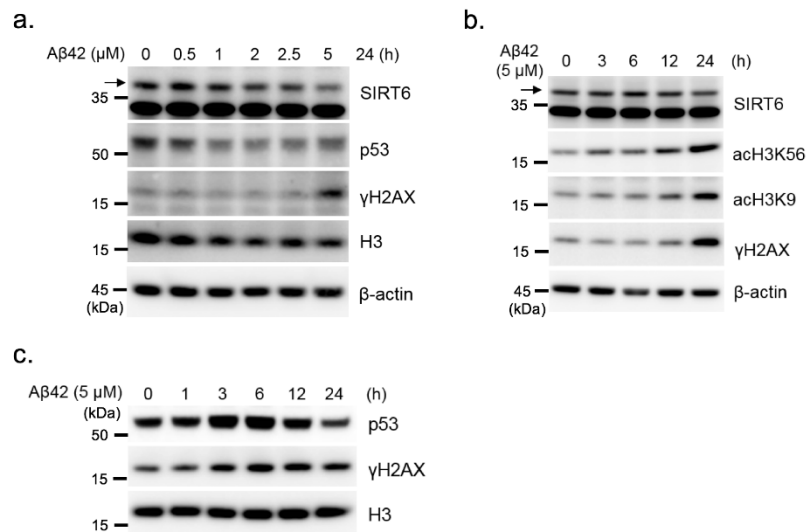

**Figure S1.** Aβ42 affects the level of SIRT6, acH3K9, acH3K56, p53 and γH2AX.

**a-c.** HT22 cells were treated with indicated concentration of Aβ42 for 24h and treated with 5 μM Aβ42 for different time points. Cells were harvested for immunoblotting with anti-SIRT6, anti-p53, anti-γH2AX, anti-acH3K9, anti-acH3K56, anti-histone H3 and anti-β-actin. β-actin and histone H3 were used as loading control. The arrow indicates the SIRT6 band.

## Supplementary figure 2.

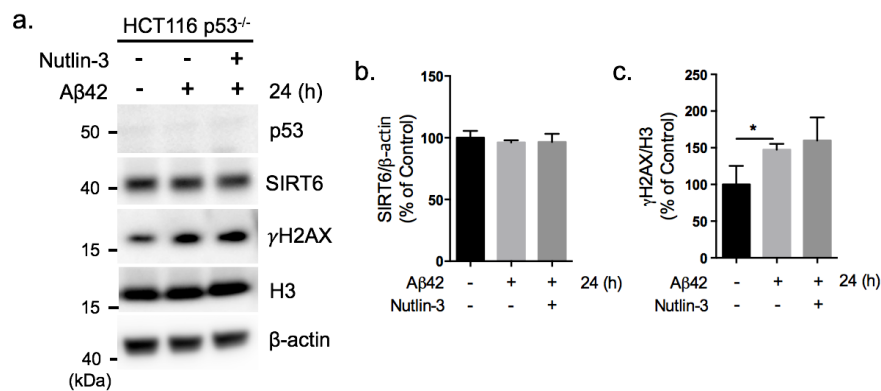

**Figure S2.** Aβ42 does not decrease the level of SIRT6 and Nutlin-3 has no effect on Aβ42-induced DNA damage in p53 deficient cells.

**a-c.** HCT116 p53-deficient cells (HCT116 p53<sup>-/-</sup>) were treated with Aβ42 (5 μM) for 24 h in the absence or in the presence of Nutlin-3. **a.** Representative image of western blotting. Cells were harvested for immunoblotting with anti-p53, anti-SIRT6, anti-γH2AX, anti-histone H3 and anti-β-actin. β-actin and histone H3 were used as loading control. **b, c.** Quantification of SIRT6 and γH2AX (n=4, \*P < 0.05, unpaired t-test).

### Supplementary figure 3

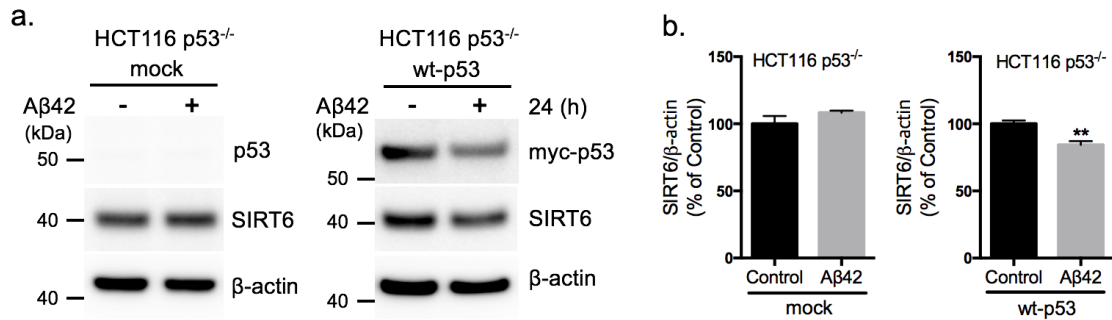

**Figure S3.** Aβ42-induced reduction of SIRT6 levels is p53-dependent.

HCT116 p53<sup>-/-</sup> cells were transfected with mock vector (pcDNA3.1) or myc-tagged wild-type p53 vector and then treated with Aβ42 for 24 hours. The cell lysates were immunoblotted with indicated antibodies. **a.** Representative image of western blotting. **b.** Quantification of SIRT6 (n=4, \*\*P < 0.01, unpaired t-test).

### Supplementary Table 1.

Human brain tissue information for normal subjects and AD patients. In all cases where AD was diagnosed at autopsy, AD was stated as the cause of death.

| Case     | Age | Sex | Braak stage | Cause of Death           |
|----------|-----|-----|-------------|--------------------------|
| Normal 1 | 87  | F   | I           | Unknown                  |
| Normal 2 | 86  | M   | II          | Unknown                  |
| Normal 3 | 67  | M   | I           | Sudden accidental death  |
| Normal 4 | 101 | F   | I           | Myocardial infarction    |
| Normal 5 | 68  | M   | I           | Congestive heart failure |
| Normal 6 | 78  | F   | I           | Unknown                  |
| AD 1     | 82  | M   | V           | AD                       |
| AD 2     | 79  | F   | VI          | AD                       |
| AD 3     | 100 | M   | V           | AD                       |
| AD 4     | 75  | M   | V           | AD                       |
| AD 5     | 83  | M   | VI          | AD                       |
| AD 6     | 79  | F   | VI          | AD                       |

## Full-length Western blot images

### Figure 1A

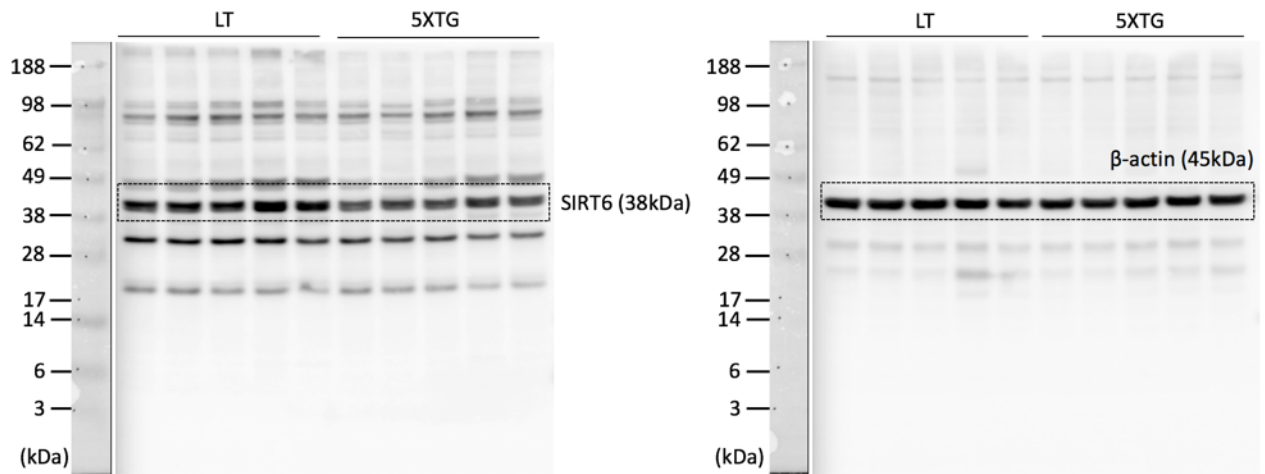

### Figure 1F

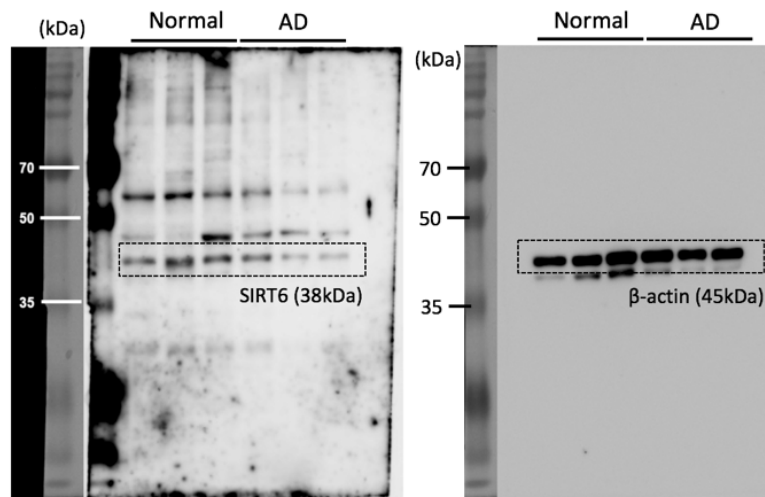

### Figure 2A

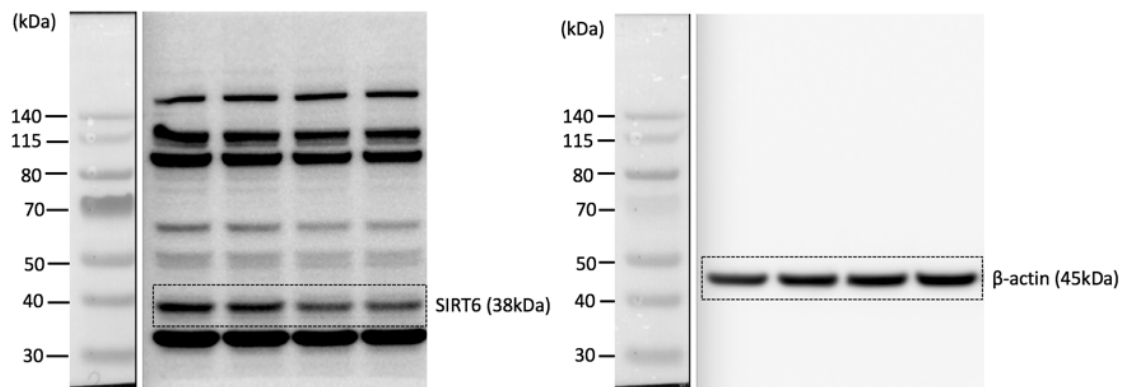

**Figure 2E**

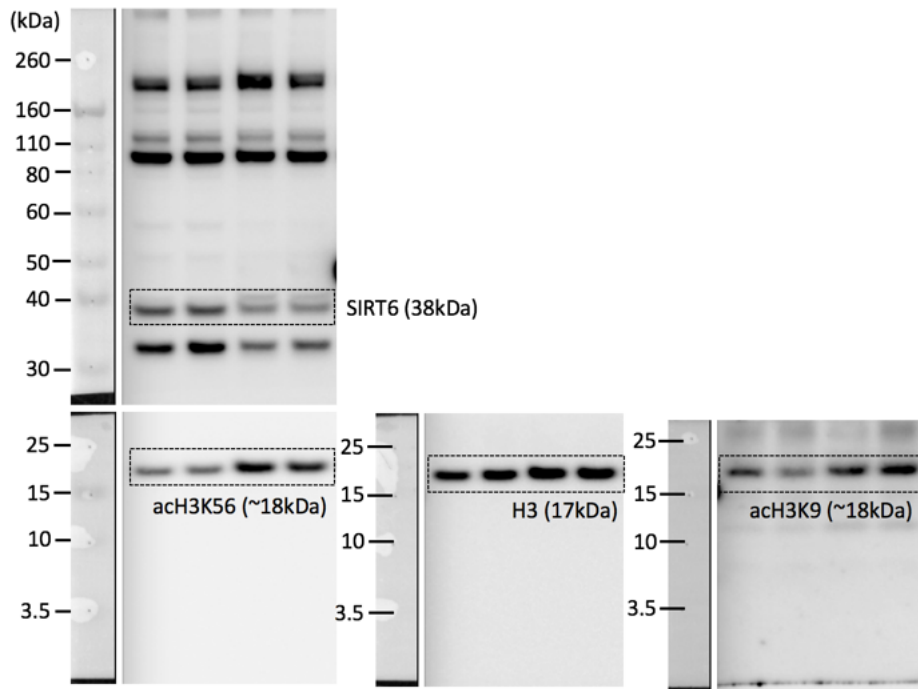

**Figure 2G**

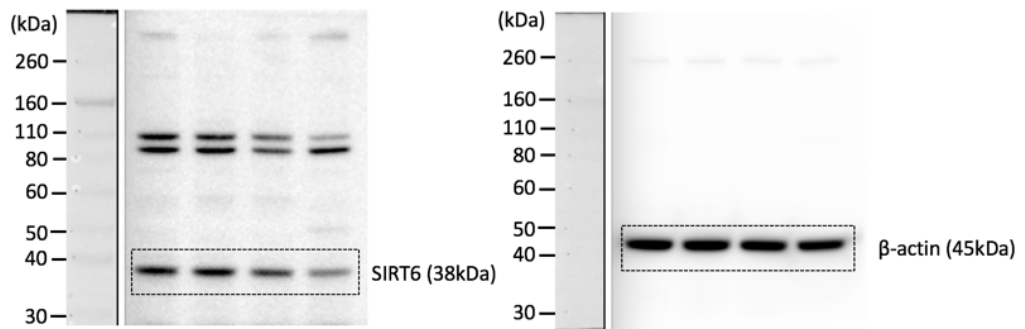

**Figure 3A**

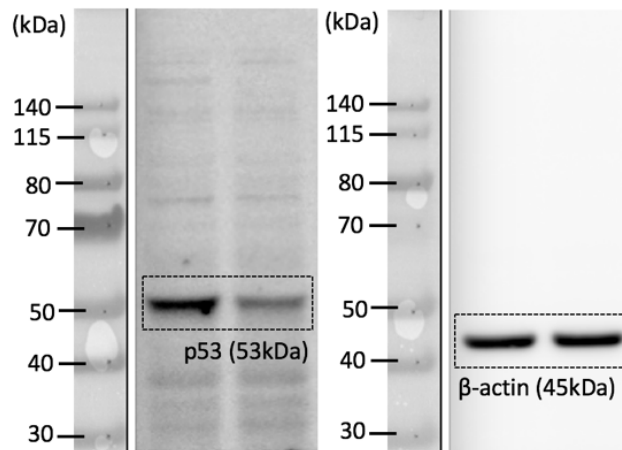

**Figure 3D**

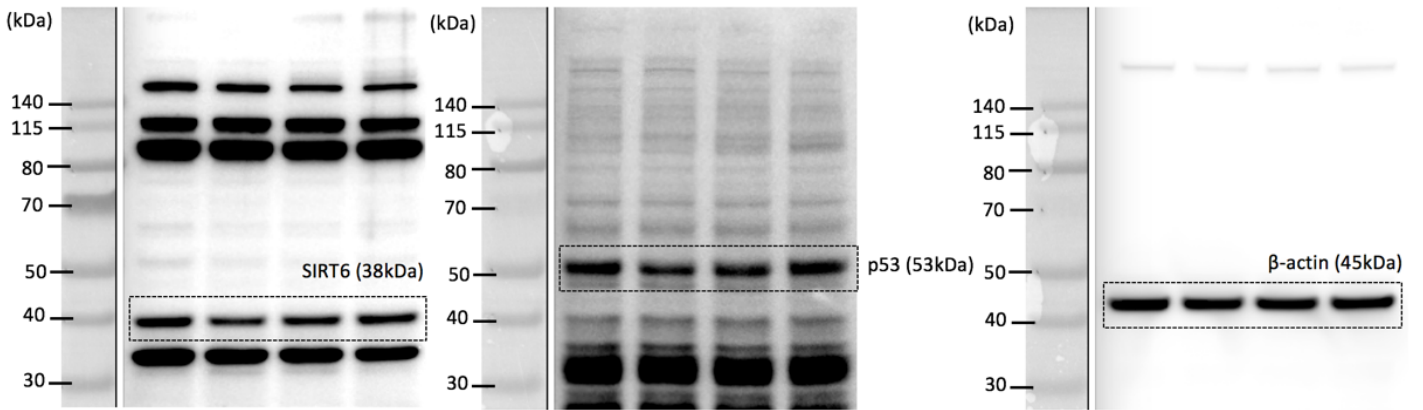

**Figure 4A**

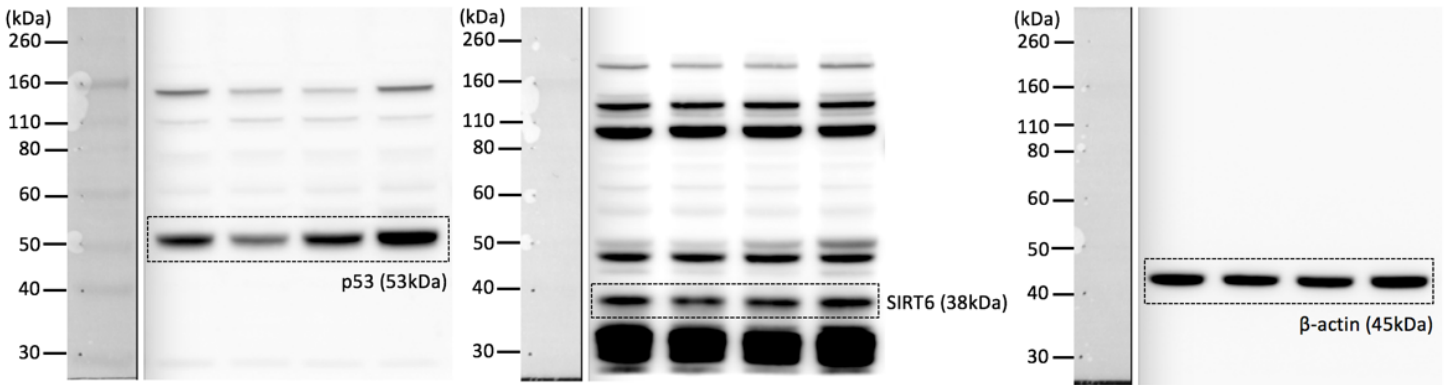

**Figure 4F**

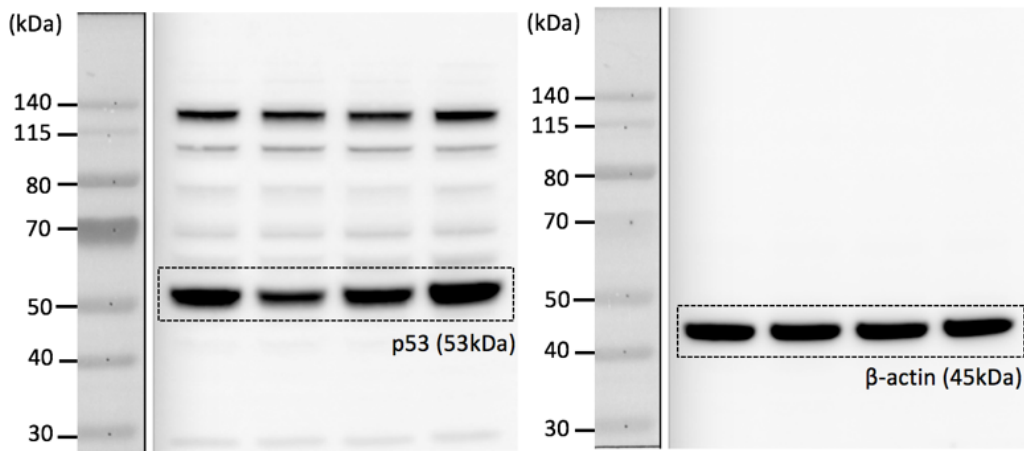

**Figure 5A**

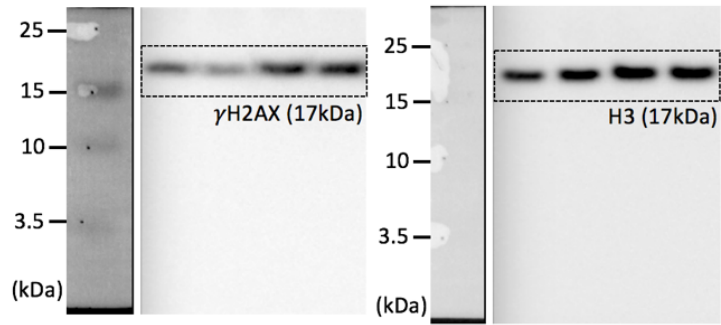

**Figure 5E**

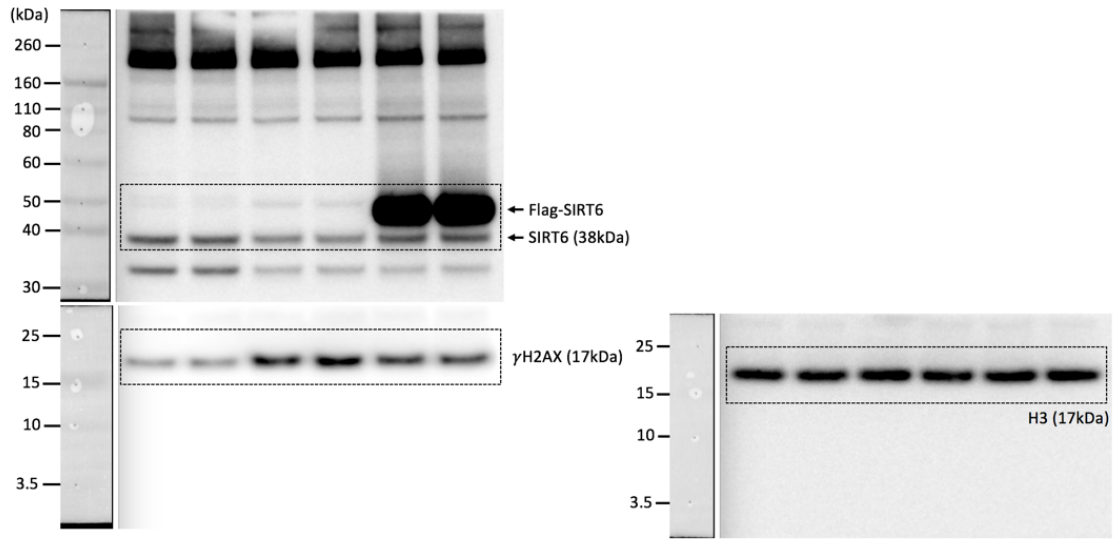

**Figure 5I**

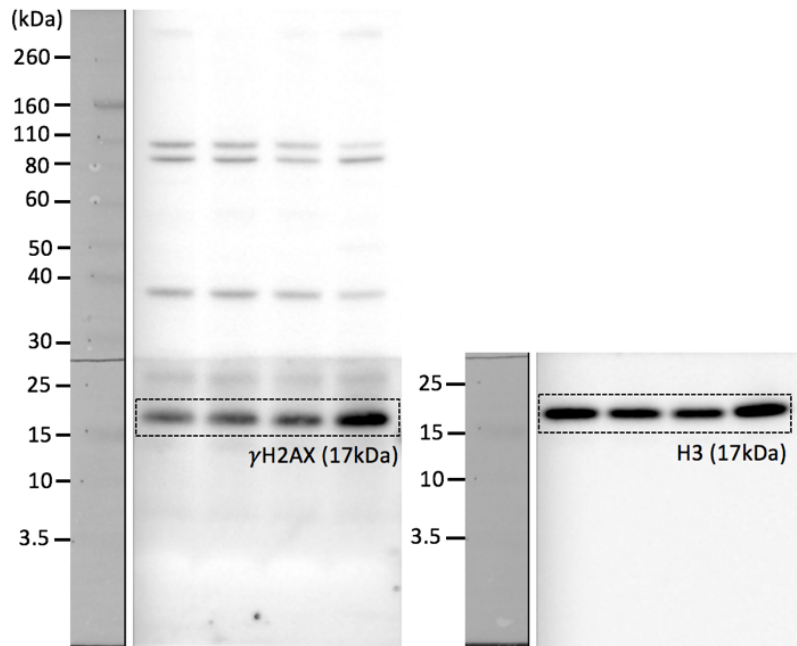

**Figure 6C**

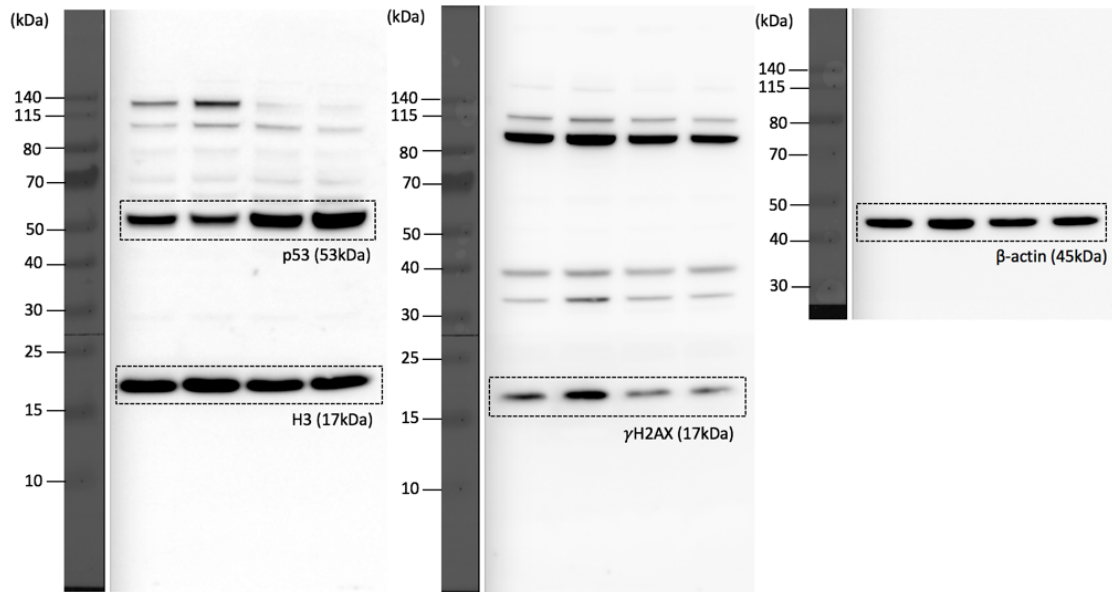

**Figure 7A**

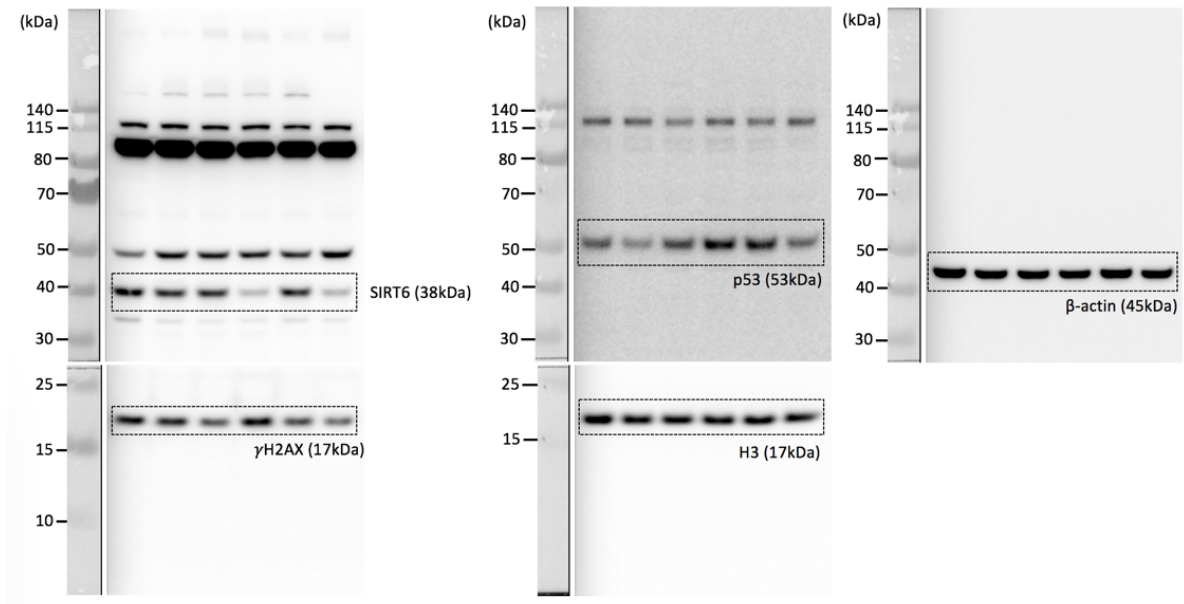

Supplement: 41598_2016_BFsrep25628_MOESM33_ESM.pdf [file 41598_2016_BFsrep25628_MOESM33_ESM.pdf]
